# Supplementary material
Source: HighWire-hosted journal article supplement (http://www.cmaj.ca/highwire/filestream/60063/field_highwire_adjunct_files/6/161020-res-3-at.pdf)
Supplement: 161020-res-3-at.pdf [file 161020-res-3-at.pdf]

### Appendix 3 (as supplied by the authors): Use of Directed Acyclic Graph (DAG) to illustrate structure of confounding with maternal infections

To illustrate the structure of confounding with this variable, we used a Directed Acyclic Graphs (DAG) described by Greenland for epidemiological research.<sup>1</sup>

See below.

*As you can see in the graph, the effect of antibiotic exposure on the risk of spontaneous abortion (SA) will be confounded if “having a urinary tract infection (UTI) measured before and during pregnancy” is a cause of both being exposed to antibiotics and having SA.*

*Given that our ultimate goal is to provide an unbiased estimate of the association between antibiotic exposure and SA, we need to block the backdoor path (Y-X-Z) to remove confounding.*

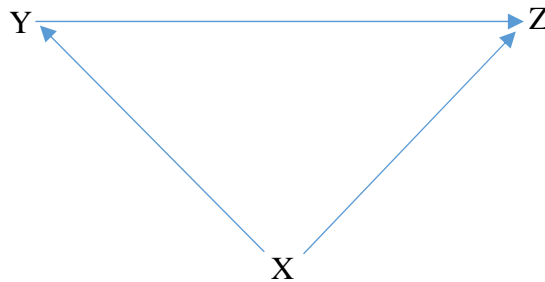

*Y: Antibiotic exposure*

*Z : SA*

*X : UTI*

### Reference

1. Greenland S, Pearl J, Robins JM. Causal diagrams for epidemiologic research. *Epidemiology* (Cambridge, Mass) 1999;10:37-48.
